# Supplementary material
Source: PubMed Central journal article supplement (PMC3213940)
Supplement: supp_00298.2011_tableS1.pdf [file supp_00298.2011_tableS1.pdf]

Supplemental Table 1. Summary of all unequivocally identified proteins

| Gene Symbol | ID                                                | Spot | State       | Max Fold | q       | Accession #   | Species                           | Size kDa | Score | AA Coverage |           | Peps | Human     | Function                                         |
|-------------|---------------------------------------------------|------|-------------|----------|---------|---------------|-----------------------------------|----------|-------|-------------|-----------|------|-----------|--------------------------------------------------|
|             |                                                   |      |             |          |         |               |                                   |          |       | %           | Ratio     |      |           |                                                  |
| AARS        | Alanyl-tRNA synthetase                            | 274  | SD ><br>LAr | 1.6      | 6.8E-03 | 73957020      | <i>Canis familiaris</i>           | 94       | 81    | 4.7         | [40/852]  | 5    | 109148542 | Protein synthesis                                |
| ACADL       | Acyl-CoA dehydrogenase (long chain)               | 1144 | LT ><br>SD  | 1.6      | 1.6E-02 | 47522692      | <i>Sus scrofa</i>                 | 48       | 187   | 28.3        | [99/350]  | 12   | 189069248 | Fatty acid and AA metabolism, $\beta$ -oxidation |
| ACADL       | Acyl-CoA dehydrogenase (long chain)               | 1152 | ET ><br>SD  | 1.6      | 1.3E-02 | 47522692      | <i>Sus scrofa</i>                 | 48       | 148   | 22.6        | [79/350]  | 10   | 4501857   | Fatty acid and AA metabolism, $\beta$ -oxidation |
| ACO2        | Aconitase 2                                       | 565  | SD ><br>LT  | 1.6      | 8.2E-03 | 74268076      | <i>Bos taurus</i>                 | 85       | 161   | 15.9        | [124/780] | 11   | 4501867   | TCA cycle                                        |
| ACTN3       | $\alpha$ -Actinin 3                               | 344  | SA ><br>ET  | 1.9      | 2.1E-02 | 7304855       | <i>Mus musculus</i>               | 103      | 254   | 26.3        | [216/820] | 19   | 4557241   | Actin anchoring                                  |
| ALB         | Albumin                                           | 656  | Ent ><br>SD | 1.9      | 4.1E-03 | 30794280      | <i>Bos taurus</i>                 | 69       | 132   | 19.7        | [104/527] | 9    | 28592     | Steroid, fatty acid and TH transport             |
| ALB         | Albumin                                           | 669  | Ent ><br>SA | 2.2      | 5.5E-03 | E:00000011284 | <i>Ictidomys tridecemlineatus</i> | 70       | 115   | 10.7        | [66/616]  | 8    | 28592     | Steroid, fatty acid and TH transport             |
| ALB         | Albumin                                           | 691  | Ent ><br>SA | 2.2      | 5.4E-03 | E:00000011284 | <i>Ictidomys tridecemlineatus</i> | 70       | 141   | 13.5        | [83/616]  | 10   | 28592     | Steroid, fatty acid and TH transport             |
| ALB         | Albumin                                           | 701  | Ent ><br>SA | 2.3      | 3.2E-03 | E:00000011284 | <i>Ictidomys tridecemlineatus</i> | 70       | 126   | 13.5        | [83/616]  | 9    | 28592     | Steroid, fatty acid and TH transport             |
| ALB         | Albumin                                           | 710  | Ent ><br>SA | 2.0      | 7.5E-03 | E:00000011284 | <i>Ictidomys tridecemlineatus</i> | 70       | 54    | 4.1         | [25/616]  | 4    | 28592     | Steroid, fatty acid and TH transport             |
| ALDH2       | Aldehyde dehydrogenase 2, mitochondrial precursor | 1011 | SD ><br>IBA | 1.4      | 4.2E-02 | 6753036       | <i>Mus musculus</i>               | 57       | 256   | 32.4        | [142/439] | 19   | 25777732  | Alcohol oxidation                                |
| ALDH9A1     | 4-Trimethylamino-butylaldehyde dehydrogenase      | 1069 | LT ><br>SD  | 1.5      | 1.1E-02 | 281348862     | <i>Ailuropoda melanoleuca</i>     | 56       | 98    | 11.5        | [59/513]  | 7    | 62511242  | GABA synthesis                                   |
| ALDOA       | Fructose-bisphosphate aldolase A                  | 1365 | SD ><br>LT  | 1.5      | 7.7E-03 | 73958481      | <i>Canis familiaris</i>           | 40       | 93    | 12.0        | [34/284]  | 6    | 4557305   | Glycolysis                                       |
| ALDOA       | Fructose-bisphosphate aldolase A                  | 1376 | SA ><br>IBA | 1.7      | 2.5E-02 | 156120479     | <i>Bos taurus</i>                 | 39       | 173   | 29.6        | [84/284]  | 12   | 49456715  | Glycolysis                                       |
| ALDOA       | Fructose-bisphosphate aldolase A                  | 1384 | SD ><br>Ent | 1.5      | 8.0E-04 | 73958481      | <i>Canis familiaris</i>           | 40       | 184   | 28.2        | [80/284]  | 11   | 4557305   | Glycolysis                                       |
| ALDOA       | Fructose-bisphosphate aldolase A                  | 1391 | SA ><br>LT  | 1.5      | 1.7E-02 | 156120479     | <i>Bos taurus</i>                 | 39       | 314   | 58.1        | [165/284] | 19   | 4557305   | Glycolysis                                       |
| ALDOA       | Fructose-bisphosphate aldolase A                  | 1396 | SD ><br>LT  | 1.7      | 1.3E-04 | 156120479     | <i>Bos taurus</i>                 | 39       | 280   | 43.0        | [122/284] | 18   | 4557305   | Glycolysis                                       |
| ALDOA       | Fructose-bisphosphate aldolase A                  | 1401 | SA ><br>LT  | 1.6      | 3.4E-02 | 4557976       | <i>Homo sapiens</i>               | 39       | 205   | 27.9        | [79/283]  | 14   | 4557305   | Glycolysis                                       |
| ANKRD2      | Ankyrin repeat domain-containing protein 2        | 1337 | IBA ><br>SD | 1.7      | 5.9E-03 | E:00000006002 | <i>Ictidomys tridecemlineatus</i> | 39       | 77    | 17.7        | [62/351]  | 5    | 11967781  | Response to stress, injury, hypertrophy          |
| ANKRD2      | Ankyrin repeat domain-containing protein 2        | 1339 | Ent ><br>SD | 1.6      | 4.1E-03 | 73998490      | <i>Canis familiaris</i>           | 37       | 60    | 12.5        | [41/329]  | 4    | 11967781  | Response to stress, injury, hypertrophy          |
| ANKRD2      | Ankyrin repeat domain-containing protein 2        | 1374 | LAr ><br>SD | 3.2      | 2.9E-03 | E:00000006002 | <i>Ictidomys tridecemlineatus</i> | 39       | 137   | 26.8        | [94/351]  | 9    | 119570301 | Response to stress, injury, hypertrophy          |
| APOA1       | Apolipoprotein A-1                                | 1840 | Ent ><br>SA | 2.5      | 1.0E-02 | E:00000002077 | <i>Ictidomys tridecemlineatus</i> | 24       | 79    | 35.0        | [71/203]  | 6    | 4557321   | Cholesterol transport                            |
| APOA1       | Apolipoprotein A-1                                | 1846 | LAr ><br>SA | 3.4      | 1.9E-04 | E:00000002077 | <i>Ictidomys tridecemlineatus</i> | 24       | 207   | 59.1        | [120/203] | 14   | 4557321   | Cholesterol transport                            |
| ARHGDI A    | Rho GDP-dissociation inhibitor 1                  | 1891 | IBA ><br>SA | 1.4      | 7.8E-03 | 31982030      | <i>Mus musculus</i>               | 23       | 100   | 0.0         | [0/124]   | 7    | 4757768   | small guanine nucleotide exchange                |
| ATP2A1      | SR/ER Ca <sup>2+</sup> -ATPase 1                  | 282  | SA >        | 2.5      | 2.7E-   | 36031132      | <i>Mus musculus</i>               | 109      | 119   | 10.2        | [93/914]  | 8    | 27886529  | Excitation-contraction                           |

|        |                                                                         |      |                     |                    |               |                                                          |     |     |      |           |    |           |                                                                                   |
|--------|-------------------------------------------------------------------------|------|---------------------|--------------------|---------------|----------------------------------------------------------|-----|-----|------|-----------|----|-----------|-----------------------------------------------------------------------------------|
| ATP2A1 | SR/ER Ca <sup>2+</sup> -ATPase 1                                        | 283  | ET<br>SD >          | 2.6<br>3.6E-04     | 36031132      | <i>Mus musculus</i>                                      | 109 | 50  | 6.0  | [55/914]  | 4  | 27886529  | coupling<br>Excitation-contraction coupling                                       |
| ATP2A1 | SR/ER Ca <sup>2+</sup> -ATPase 1                                        | 288  | LT<br>SD >          | 2.1<br>3.7E-02     | 36031132      | <i>Mus musculus</i>                                      | 109 | 72  | 7.7  | [70/914]  | 5  | 27886529  | Excitation-contraction coupling                                                   |
| ATP2A1 | SR/ER Ca <sup>2+</sup> -ATPase 1                                        | 291  | IBA<br>SD >         | 2.2<br>5.1E-03     | 36031132      | <i>Mus musculus</i>                                      | 109 | 40  | 4.8  | [44/914]  | 3  | 27886529  | Excitation-contraction coupling                                                   |
| ATP2A1 | SR/ER Ca <sup>2+</sup> -ATPase 1                                        | 294  | ET<br>SD >          | 4.6<br>2.7E-04     | 36031132      | <i>Mus musculus</i>                                      | 109 | 138 | 11.1 | [101/914] | 10 | 27886529  | Excitation-contraction coupling                                                   |
| ATP2A1 | SR/ER Ca <sup>2+</sup> -ATPase 1                                        | 300  | ET<br>SD >          | 3.8<br>5.7E-04     | 36031132      | <i>Mus musculus</i>                                      | 109 | 85  | 7.7  | [70/914]  | 6  | 27886529  | Excitation-contraction coupling                                                   |
| ATP2A1 | SR/ER Ca <sup>2+</sup> -ATPase 1                                        | 309  | LAr<br>LT >         | 2.9<br>4.8E-03     | 36031132      | <i>Mus musculus</i>                                      | 109 | 70  | 6.2  | [57/914]  | 5  | 27886529  | Excitation-contraction coupling                                                   |
| BTF3L4 | Basic transcription factor 3-like 4                                     | 2064 | SA<br>IBA >         | 1.4<br>1.5E-03     | 126305710     | <i>Monodelphis domestica</i><br><i>Ictidomys</i>         | 31  | 55  | 11.9 | [34/287]  | 4  | 46255705  | Transcription factor                                                              |
| CAT    | Catalase                                                                | 771  | SA<br>ET >          | 1.8<br>5.6E-03     | E:00000007701 | <i>tridecemlineatus</i>                                  | 60  | 216 | 34.0 | [179/527] | 15 | 13562132  | H <sub>2</sub> O <sub>2</sub> catabolism<br>regulation of actin filament dynamics |
| CFL2   | Cofilin-2                                                               | 2127 | SA<br>IBA >         | 1.6<br>5.6E-03     | 14719392      | <i>Homo sapiens</i><br><i>Ailuropoda melanoleuca</i>     | 19  | 110 | 65.1 | [56/86]   | 7  |           |                                                                                   |
| CKM    | Creatine kinase, muscle                                                 | 1370 | Ar<br>SA >          | 2.6<br>4.1E-03     | 281337438     | <i>Ailuropoda melanoleuca</i>                            | 43  | 67  | 15.5 | [59/381]  | 5  | 21536288  | Energy homeostasis                                                                |
| CKM    | Creatine kinase, muscle                                                 | 1388 | LT<br>IBA >         | 1.4<br>3.6E-02     | 281337438     | <i>Ailuropoda melanoleuca</i>                            | 43  | 302 | 43.6 | [166/381] | 19 | 119577741 | Energy homeostasis                                                                |
| CMPK1  | Cytidine monophosphate (UMP-CMP) kinase 1, cytosolic                    | 1968 | SD<br>LT >          | 1.4<br>2.6E-02     | 194207483     | <i>Equus caballus</i><br><i>Ictidomys</i>                | 20  | 101 | 33.3 | [58/174]  | 8  | 12644008  | Nucleic acid synthesis                                                            |
| CRAT   | Carnitine O-acetyltransferase                                           | 776  | SD<br>LT >          | 1.5<br>5.6E-02     | E:00000001334 | <i>tridecemlineatus</i><br><i>Nannospalax ehrenbergi</i> | 70  | 154 | 19.5 | [120/617] | 12 | 13111705  | AcylCoA/CoA regulation                                                            |
| CRYAB  | AlphaB-crystallin                                                       | 2054 | SD<br>ET >          | 2.3<br>2.7E-03     | 13162243      | <i>Ictidomys</i>                                         | 20  | 75  | 27.7 | [47/170]  | 6  | 4503057   | Chaperone                                                                         |
| DLST   | Dihydroliipoamide S-succinyltransferase                                 | 1018 | SA<br>ET >          | 1.5<br>4.1E-02     | 21313536      | <i>Mus musculus</i>                                      | 49  | 153 | 18.5 | [69/374]  | 11 | 643589    | TCA cycle                                                                         |
| DLST   | Dihydroliipoamide S-succinyltransferase                                 | 1196 | SA<br>IBA >         | 1.4<br>1.0E-02     | 62512126      | <i>Rattus norvegicus</i>                                 | 49  | 96  | 8.6  | [32/374]  | 7  | 643589    | TCA cycle                                                                         |
| DPYSL3 | Dihydropyrimidinase-like 3                                              | 832  | ET<br>Ent >         | 1.5<br>3.8E-02     | 50417352      | <i>Homo sapiens</i>                                      | 74  | 208 | 13.7 | [83/604]  | 13 |           | Cytoskeletal remodeling                                                           |
| DPYSL3 | Dihydropyrimidinase-like 3                                              | 834  | SD<br>LT >          | 1.4<br>2.7E-02     | 4503379       | <i>Homo sapiens</i><br><i>Ictidomys</i>                  | 62  | 130 | 16.1 | [79/490]  | 9  |           | Cytoskeletal remodeling                                                           |
| DUSP3  | Dual specificity protein phosphatase 3                                  | 2051 | SA<br>IBA >         | 2.8<br>8.8E-04     | E:00000012358 | <i>tridecemlineatus</i>                                  | 21  | 42  | 22.7 | [42/185]  | 3  | 4758208   | Protein phosphatase                                                               |
| ECH1   | Enoyl CoA hydratase 1, peroxisomal                                      | 1667 | SD<br>LT >          | 2.0<br>1.7E-04     | 999015860     | <i>Urocitellus parryi</i>                                | 27  | 172 | 24.1 | [79/328]  | 11 | 70995211  | β-oxidation                                                                       |
| ETFA   | Electron-transfer-flavoprotein, α polypeptide                           | 1640 | SD                  | 1.5                | 74000809      | <i>Canis familiaris</i>                                  | 35  | 212 | 48.7 | [162/333] | 12 | 4503607   | β-oxidation                                                                       |
| ETFDH  | Electron transfer flavoprotein-ubiquinone oxidoreductase, mitochondrial | 791  | IBA ><br>SA<br>LT > | 1.4E-02<br>3.9E-02 | 281354353     | <i>Ailuropoda melanoleuca</i><br><i>Ictidomys</i>        | 68  | 278 | 36.5 | [222/608] | 19 | 260170    | ETC                                                                               |
| FABP3  | Fatty acid-binding protein, heart                                       | 2247 | SA<br>LT >          | 1.5<br>2.0E-03     | 20138311      | <i>tridecemlineatus</i><br><i>Ictidomys</i>              | 15  | 61  | 18.9 | [10/53]   | 4  | 4758328   | Fatty acid transport                                                              |
| FABP3  | Fatty acid-binding protein, heart                                       | 2257 | SD<br>LT >          | 2.6<br>1.5E-03     | 20138311      | <i>tridecemlineatus</i><br><i>Ictidomys</i>              | 15  | 74  | 45.3 | [24/53]   | 5  | 4758328   | Fatty acid transport                                                              |
| FABP3  | Fatty acid-binding protein, heart                                       | 2288 | SD<br>LT >          | 2.5<br>2.0E-03     | 20138311      | <i>tridecemlineatus</i><br><i>Ictidomys</i>              | 15  | 73  | 45.3 | [24/53]   | 5  | 4758328   | Fatty acid transport                                                              |
| FABP3  | Fatty acid-binding protein, heart                                       | 2293 | SD                  | 2.4                | 20138311      | <i>tridecemlineatus</i>                                  | 15  | 122 | 56.6 | [30/53]   | 9  | 4758328   | Fatty acid transport                                                              |

|        |                                                        |      |                       |     |         |               |                                   |    |     |      |           |    |           |                                                            |
|--------|--------------------------------------------------------|------|-----------------------|-----|---------|---------------|-----------------------------------|----|-----|------|-----------|----|-----------|------------------------------------------------------------|
| FABP4  | Fatty acid-binding protein, adipocyte                  | 2280 | LT ><br>SD            | 2.4 | 3.3E-02 | 20138310      | <i>Ictidomys tridecemlineatus</i> | 15 | 126 | 0.0  | [0/52]    | 8  | 4557579   | Fatty acid transport                                       |
| GARS   | Glycyl-tRNA synthetase                                 | 601  | Ar ><br>SA            | 1.3 | 1.6E-02 | 293346809     | <i>Rattus norvegicus</i>          | 82 | 184 | 17.8 | [115/648] | 12 | 600727    | aminoacyl-tRNA synthetase                                  |
| GFM1   | G elongation factor, mitochondrial isoform 3           | 519  | SD ><br>IBA           | 1.4 | 1.3E-02 | 76660421      | <i>Bos taurus</i>                 | 84 | 53  | 5.7  | [43/753]  | 4  | 14285174  | Mitochondrial protein synthesis                            |
| GPD1   | Glycerol-3-phosphate dehydrogenase [NAD+], cytoplasmic | 1575 | SD ><br>LT            | 1.8 | 5.7E-04 | E:00000004439 | <i>Ictidomys tridecemlineatus</i> | 38 | 349 | 47.1 | [163/346] | 23 | 33695088  | Aerobic respiration, E-donor, glycerol-3-phosphate shuttle |
| GPD1   | Glycerol-3-phosphate dehydrogenase [NAD+], cytoplasmic | 1609 | SA ><br>IBA<br>Ent >  | 1.3 | 4.3E-02 | 33695088      | <i>Homo sapiens</i>               | 38 | 74  | 7.1  | [19/269]  | 5  |           | Aerobic respiration, E-donor, glycerol-3-phosphate shuttle |
| HADHA  | Trifunctional enzyme subunit α                         | 587  | SA ><br>Ent >         | 1.4 | 2.6E-02 | E:00000001425 | <i>Ictidomys tridecemlineatus</i> | 81 | 36  | 1.4  | [10/739]  | 3  | 862457    | β-oxidation                                                |
| HADHA  | Trifunctional enzyme subunit α                         | 600  | SA ><br>Ent >         | 1.7 | 5.7E-03 | E:00000001425 | <i>Ictidomys tridecemlineatus</i> | 81 | 221 | 16.2 | [120/739] | 16 | 862457    | β-oxidation                                                |
| HADHA  | Trifunctional enzyme subunit α                         | 604  | SA ><br>Ent >         | 1.7 | 4.8E-04 | E:00000001425 | <i>Ictidomys tridecemlineatus</i> | 81 | 94  | 4.1  | [30/739]  | 7  | 862457    | β-oxidation                                                |
| HADHA  | Trifunctional enzyme subunit α                         | 607  | SA ><br>Ent ><br>LT > | 1.4 | 1.9E-02 | E:00000001425 | <i>Ictidomys tridecemlineatus</i> | 81 | 214 | 11.8 | [87/739]  | 15 | 595267    | β-oxidation                                                |
| HADHA  | Trifunctional enzyme subunit α                         | 608  | SA ><br>ET >          | 1.6 | 5.7E-03 | E:00000001425 | <i>Ictidomys tridecemlineatus</i> | 81 | 76  | 3.5  | [26/739]  | 6  | 862457    | β-oxidation                                                |
| HADHA  | Trifunctional enzyme subunit α                         | 609  | SA ><br>LT >          | 1.7 | 3.9E-02 | E:00000001425 | <i>Ictidomys tridecemlineatus</i> | 81 | 135 | 8.9  | [66/739]  | 10 | 862457    | β-oxidation                                                |
| HADHA  | Trifunctional enzyme subunit α                         | 615  | SA ><br>LAr >         | 1.5 | 2.7E-04 | E:00000001425 | <i>Ictidomys tridecemlineatus</i> | 81 | 145 | 8.9  | [66/739]  | 11 | 862457    | β-oxidation                                                |
| HBB    | β-hemoglobin                                           | 2310 | SA ><br>Ar >          | 3.6 | 1.2E-04 | 999016132     | <i>Urocyon parryi</i>             | 14 | 136 | 68.7 | [101/147] | 9  | 4504351   | O <sub>2</sub> transport                                   |
| HBB    | β-hemoglobin                                           | 2316 | SA ><br>Ar >          | 3.3 | 1.2E-04 | 122689        | <i>Spermophilus townsendii</i>    | 16 | 104 | 61.6 | [90/146]  | 7  | 4504351   | O <sub>2</sub> transport                                   |
| HBB    | β-hemoglobin                                           | 2318 | SA ><br>LT >          | 3.2 | 2.7E-04 | 122637        | <i>Marmota marmota</i>            | 16 | 87  | 44.5 | [65/146]  | 6  | 4504351   | O <sub>2</sub> transport                                   |
| HIBADH | 3-Hydroxyisobutyrate dehydrogenase, mitochondrial      | 1681 | SA ><br>SA >          | 1.4 | 5.3E-03 | E:00000003688 | <i>Ictidomys tridecemlineatus</i> | 32 | 143 | 31.8 | [95/299]  | 9  | 23308751  | Valine catabolism                                          |
| HSPA4  | Heat shock 70kDa protein 4                             | 246  | Ar ><br>IBA >         | 2.1 | 2.1E-02 | 4579909       | <i>Homo sapiens</i>               | 94 | 53  | 4.9  | [41/840]  | 4  |           | Chaperone                                                  |
| HSPB1  | Heat shock protein β1                                  | 1863 | LAr ><br>Ent >        | 3.2 | 3.0E-05 | 291390901     | <i>Oryctolagus cuniculus</i>      | 23 | 63  | 18.1 | [37/204]  | 4  | 4504517   | Stress resistance/actin organization                       |
| HSPB1  | Heat shock protein β1                                  | 1878 | >LAr ><br>IBA >       | 1.8 | 1.4E-03 | 291390901     | <i>Oryctolagus cuniculus</i>      | 23 | 59  | 18.1 | [37/204]  | 4  | 4504517   | Stress resistance/actin organization                       |
| HSPB6  | Heat shock protein β6                                  | 2073 | LT ><br>LT >          | 3.2 | 8.2E-03 | 291412016     | <i>Oryctolagus cuniculus</i>      | 17 | 40  | 29.6 | [48/162]  | 3  | 21389433  | Response to heat shock, ischemia/reperfusion               |
| HSPB6  | Heat shock protein β6                                  | 2084 | SA ><br>Ar >          | 1.6 | 1.7E-02 | E:00000008172 | <i>Ictidomys tridecemlineatus</i> | 17 | 52  | 29.4 | [47/160]  | 4  | 21389433  | Response to heat shock, ischemia/reperfusion               |
| HSPD1  | 60 kDa Heat shock protein, mitochondrial               | 806  | SD ><br>Ar >          | 1.6 | 4.3E-02 | 90077962      | <i>Macaca fascicularis</i>        | 61 | 444 | 39.4 | [226/573] | 28 | 31542947  | Mitochondrial protein folding                              |
| HSPD1  | 60 kDa Heat shock protein, mitochondrial               | 812  | SA ><br>Ar >          | 1.5 | 1.3E-02 | 90077962      | <i>Macaca fascicularis</i>        | 61 | 426 | 44.7 | [256/573] | 26 | 31542947  | Mitochondrial protein folding                              |
| IDH3A  | Isocitrate dehydrogenase [NAD], α subunit              | 1327 | IBA ><br>SA >         | 1.5 | 1.5E-02 | 68565568      | <i>Pongo pygmaeus abelii</i>      | 40 | 115 | 22.7 | [65/286]  | 8  | 5031777   | TCA cycle, redox                                           |
| IDH3A  | Isocitrate dehydrogenase [NAD], α subunit              | 1350 | IBA ><br>SD >         | 1.7 | 2.3E-02 | 68565568      | <i>Pongo pygmaeus abelii</i>      | 40 | 153 | 28.0 | [80/286]  | 11 | 5031777   | TCA cycle, redox                                           |
| IMMT   | Mitofilin                                              | 657  | Ent ><br>SD           | 3.6 | 3.0E-05 | E:00000011319 | <i>Ictidomys tridecemlineatus</i> | 83 | 53  | 5.3  | [39/738]  | 4  | 154354964 | Mitochondrial cristae morphology                           |

|        |                                                                  |      |              |           |       |               |                                             |     |     |      |           |    |           |                                                        |
|--------|------------------------------------------------------------------|------|--------------|-----------|-------|---------------|---------------------------------------------|-----|-----|------|-----------|----|-----------|--------------------------------------------------------|
| IMMT   | Mitofilin                                                        | 673  | Ent ><br>SD  | 1.4<br>03 | 8.7E- | E:00000011319 | <i>Ictidomys</i><br><i>tridecemlineatus</i> | 83  | 126 | 12.5 | [92/738]  | 9  | 154354964 | Mitochondrial cristae morphology                       |
| MCCC1  | Methylcrotonoyl-CoA carboxylase subunit $\alpha$ , mitochondrial | 590  | LAr ><br>SA  | 1.5<br>02 | 3.0E- | E:00000009303 | <i>Ictidomys</i><br><i>tridecemlineatus</i> | 75  | 54  | 5.3  | [36/678]  | 4  | 12276066  | Mitochondrial AA degradation                           |
| MDH1   | Malate dehydrogenase, cytoplasmic                                | 1472 | LT ><br>SD   | 1.6<br>02 | 4.2E- | E:00000012741 | <i>Ictidomys</i><br><i>tridecemlineatus</i> | 36  | 198 | 38.1 | [127/333] | 13 | 5174539   | Malate-aspartate shuttle                               |
| MDH1   | Malate dehydrogenase, cytoplasmic                                | 1523 | LT ><br>SD   | 1.7<br>02 | 2.6E- | E:00000012741 | <i>Ictidomys</i><br><i>tridecemlineatus</i> | 36  | 207 | 47.2 | [157/333] | 14 | 5174539   | Malate-aspartate shuttle                               |
| MDH2   | Malate dehydrogenase, mitochondrial                              | 1552 | IBA ><br>SA  | 1.5<br>02 | 2.1E- | 999617        | <i>Sus scrofa</i><br><i>Ictidomys</i>       | 33  | 276 | 60.3 | [141/234] | 18 | 2906146   | TCA cycle, malate-aspartate shuttle                    |
| MRPL12 | mitochondrial ribosomal protein L12                              | 2089 | LT ><br>LAr  | 2.2<br>02 | 1.5E- | E:00000006153 | <i>tridecemlineatus</i><br><i>Ictidomys</i> | 19  | 65  | 21.3 | [37/174]  | 5  | 27436901  | Mitochondrial protein synthesis                        |
| MVP    | Major vault protein                                              | 269  | SD ><br>ET   | 1.8<br>03 | 4.1E- | E:00000001327 | <i>Ictidomys</i><br><i>tridecemlineatus</i> | 99  | 279 | 26.3 | [234/889] | 20 | 194378554 | Protein signal transduction                            |
| MYH4   | Myosin heavy chain 4                                             | 25   | SA ><br>ET   | 1.8<br>03 | 5.1E- | 67189167      | <i>Mus musculus</i>                         | 223 | 100 | 5.3  | [98/1859] | 8  | 153791586 | Contraction                                            |
| NDRG2  | N-myc downstream regulated protein family 2                      | 1159 | Ent ><br>SD  | 1.8<br>03 | 9.6E- | 73977281      | <i>Canis familiaris</i>                     | 41  | 104 | 19.7 | [73/371]  | 7  | 42544211  | Sodium absorption, cell proliferation, differentiation |
| NME2   | Nucleoside diphosphate kinase B                                  | 2141 | SA ><br>ET   | 3.0<br>03 | 8.2E- | 4505409       | <i>Homo sapiens</i>                         | 17  | 94  | 48.6 | [35/72]   | 7  |           | Nucleoside triphosphate synthesis (non-ATP)            |
| OGDH   | 2-Oxoglutarate dehydrogenase                                     | 275  | SD ><br>ET   | 2.3<br>02 | 1.7E- | 29145087      | <i>Mus musculus</i>                         | 116 | 49  | 5.0  | [51/1019] | 4  | 2160381   | TCA cycle                                              |
| OGDH   | 2-Oxoglutarate dehydrogenase                                     | 298  | SD ><br>ET   | 1.5<br>02 | 1.8E- | 85861164      | <i>Mus musculus</i>                         | 116 | 87  | 6.6  | [62/943]  | 6  | 51873036  | TCA cycle                                              |
| PDHA1  | Pyruvate dehydrogenase E1 component, $\alpha$ subunit            | 1232 | IBA ><br>SA  | 1.8<br>05 | 4.0E- | 74006561      | <i>Canis familiaris</i>                     | 43  | 61  | 6.2  | [24/390]  | 4  | 4505685   | Glycolysis – TCA cycle link                            |
| PDHA1  | Pyruvate dehydrogenase E1 component, $\alpha$ subunit            | 1237 | ET ><br>SA   | 1.7<br>04 | 2.7E- | 74006561      | <i>Canis familiaris</i>                     | 43  | 119 | 10.8 | [42/390]  | 8  | 4505685   | Glycolysis – TCA cycle link                            |
| PDHA1  | Pyruvate dehydrogenase E1 component, $\alpha$ subunit            | 1238 | ET ><br>SA   | 1.7<br>05 | 9.2E- | 74006561      | <i>Canis familiaris</i>                     | 43  | 59  | 6.2  | [24/390]  | 4  | 4505685   | Glycolysis – TCA cycle link                            |
| PDK4   | Pyruvate dehydrogenase kinase, isozyme 4                         | 1244 | IBA ><br>SD  | 2.1<br>04 | 1.2E- | 12585306      | <i>Ictidomys</i><br><i>tridecemlineatus</i> | 47  | 173 | 22.9 | [76/332]  | 11 | 4505693   | Glucose metabolism                                     |
| PGM1   | Glucose phosphomutase 1                                          | 737  | LAr ><br>Ent | 5.3<br>02 | 1.3E- | E:00000006771 | <i>Ictidomys</i><br><i>tridecemlineatus</i> | 62  | 327 | 37.3 | [212/568] | 22 | 60551975  | 1-6 phosphate transfer                                 |
| PGM1   | Glucose phosphomutase 1                                          | 741  | SA ><br>Ent  | 3.3<br>02 | 2.2E- | 227330633     | <i>Mus musculus</i>                         | 61  | 281 | 37.8 | [182/482] | 20 | 60551975  | 1-6 phosphate transfer                                 |
| PGM1   | Glucose phosphomutase 1                                          | 742  | SA ><br>Ent  | 2.0<br>02 | 3.6E- | 73621393      | <i>Macaca fascicularis</i>                  | 61  | 161 | 22.2 | [107/482] | 11 | 21361621  | 1-6 phosphate transfer                                 |
| PGM1   | Glucose phosphomutase 1                                          | 749  | SD ><br>Ent  | 1.8<br>02 | 3.0E- | 73621393      | <i>Macaca fascicularis</i>                  | 61  | 139 | 18.9 | [91/482]  | 10 | 21361621  | 1-6 phosphate transfer                                 |
| PGM1   | Glucose phosphomutase 1                                          | 751  | SD ><br>Ent  | 4.2<br>03 | 7.5E- | 73621393      | <i>Macaca fascicularis</i>                  | 61  | 368 | 52.7 | [254/482] | 25 | 21361621  | 1-6 phosphate transfer                                 |
| PGM1   | Glucose phosphomutase 1                                          | 752  | Ent ><br>LAr | 1.4<br>02 | 3.8E- | 227330633     | <i>Mus musculus</i>                         | 61  | 210 | 24.7 | [119/482] | 14 | 189926    | 1-6 phosphate transfer                                 |
| PGM1   | Glucose phosphomutase 1                                          | 757  | Ent ><br>LAr | 1.8<br>02 | 1.3E- | E:00000006771 | <i>Ictidomys</i><br><i>tridecemlineatus</i> | 62  | 382 | 45.1 | [256/568] | 26 | 60551975  | 1-6 phosphate transfer                                 |
| PKM2   | Pyruvate kinase                                                  | 865  | SA ><br>LT   | 1.7<br>03 | 3.3E- | 3659945       | <i>Oryctolagus cuniculus</i>                | 58  | 292 | 29.8 | [134/450] | 19 | 33286418  | Glycolysis                                             |
| PKM2   | Pyruvate kinase                                                  | 868  | SA ><br>LT   | 1.6<br>02 | 1.6E- | 73916936      | <i>Felis catus</i>                          | 58  | 219 | 24.5 | [130/531] | 14 | 33286418  | Glycolysis                                             |
| PKM2   | Pyruvate kinase                                                  | 869  | SA ><br>LT   | 1.7<br>02 | 1.6E- | 67464392      | <i>Homo sapiens</i>                         | 60  | 353 | 31.2 | [171/548] | 22 | 189998    | Glycolysis                                             |
| PKM2   | Pyruvate kinase                                                  | 870  | Ent ><br>SA  | 1.7<br>03 | 7.7E- | 74000677      | <i>Canis familiaris</i>                     | 58  | 369 | 39.6 | [210/531] | 24 | 33286418  | Glycolysis                                             |

|        |                                                   |      |               |                    |                    |                                                         |    |     |      |           |    |          |                                                                   |
|--------|---------------------------------------------------|------|---------------|--------------------|--------------------|---------------------------------------------------------|----|-----|------|-----------|----|----------|-------------------------------------------------------------------|
| PKM2   | Pyruvate kinase                                   | 875  | SA ><br>LT    | 1.6<br>03          | 7.7E-<br>157833510 | <i>Felis catus</i>                                      | 58 | 394 | 41.9 | [222/530] | 25 | 33286418 | Glycolysis                                                        |
| PRDX1  | Peroxiredoxin 1                                   | 1888 | SA ><br>LT >  | 1.5<br>03<br>1.3E- | 73977959           | <i>Canis familiaris</i><br><i>Ictidomys</i>             | 22 | 132 | 53.8 | [64/119]  | 10 | 4505591  | Antioxidant function                                              |
| PRDX3  | Peroxiredoxin 3                                   | 1866 | SD ><br>SD >  | 1.5<br>02<br>3.2E- | E:00000002268      | <i>tridecemlineatus</i>                                 | 28 | 144 | 43.2 | [111/257] | 9  | 5802974  | Antioxidant function<br>Protein degradation via ubiquitin pathway |
| PSMD14 | Proteasome 26S subunit, non-ATPase, 14            | 1614 | LT ><br>SA >  | 1.5<br>03<br>2.3E- | 74004396           | <i>Canis familiaris</i><br><i>Oryctolagus cuniculus</i> | 33 | 60  | 6.9  | [15/219]  | 4  | 5031981  | Protein degradation via ubiquitin pathway                         |
| PYGM   | Glycogen phosphorylase                            | 379  | LT ><br>SA >  | 1.6<br>02<br>2.5E- | 231257             | <i>Oryctolagus cuniculus</i>                            | 97 | 207 | 17.5 | [133/762] | 15 | 5032009  | Glycogenolysis                                                    |
| PYGM   | Glycogen phosphorylase                            | 388  | ET ><br>SA >  | 1.6<br>02<br>7.7E- | 126723305          | <i>Oryctolagus cuniculus</i>                            | 97 | 326 | 25.4 | [194/763] | 23 | 5032009  | Glycogenolysis                                                    |
| PYGM   | Glycogen phosphorylase                            | 412  | LT ><br>SA >  | 2.2<br>03<br>2.8E- | 126723305          | <i>Oryctolagus cuniculus</i>                            | 97 | 147 | 11.0 | [84/763]  | 11 | 5032009  | Glycogenolysis                                                    |
| PYGM   | Glycogen phosphorylase                            | 414  | LT ><br>SA >  | 1.6<br>02<br>4.4E- | 126723305          | <i>Oryctolagus cuniculus</i>                            | 97 | 144 | 11.0 | [84/763]  | 10 | 5032009  | Glycogenolysis                                                    |
| PYGM   | Glycogen phosphorylase                            | 423  | LT ><br>SD >  | 1.8<br>02<br>1.3E- | 126723305          | <i>Oryctolagus cuniculus</i>                            | 97 | 313 | 24.3 | [185/763] | 22 | 5032009  | Glycogenolysis                                                    |
| PYGM   | Glycogen phosphorylase                            | 520  | LT ><br>SD >  | 1.8<br>03<br>2.6E- | 126723305          | <i>Oryctolagus cuniculus</i>                            | 97 | 287 | 21.0 | [160/763] | 21 | 5032009  | Glycogenolysis                                                    |
| ST13   | Heat shock 70kD protein binding protein isoform 4 | 1002 | ET ><br>ET >  | 1.4<br>02<br>5.0E- | 73969009           | <i>Canis familiaris</i>                                 | 25 | 41  | 10.7 | [23/216]  | 3  | 19923193 | HSP70-HSP90 association                                           |
| SUCLA2 | Succinate-CoA ligase, β subunit                   | 1182 | SD ><br>LT >  | 1.4<br>02<br>3.9E- | 194221896          | <i>Equus caballus</i><br><i>Ictidomys</i>               | 50 | 223 | 23.5 | [109/463] | 15 | 11321583 | TCA cycle                                                         |
| TBCA   | Tubulin folding cofactor A                        | 2194 | SA ><br>LAr > | 1.4<br>05<br>3.8E- | 999015971          | <i>tridecemlineatus</i><br><i>Ictidomys</i>             | 13 | 128 | 44.4 | [48/108]  | 8  | 4759212  | β-tubulin folding                                                 |
| TF     | Transferrin                                       | 525  | SA ><br>LAr > | 1.6<br>02<br>4.1E- | E:00000012640      | <i>tridecemlineatus</i><br><i>Ictidomys</i>             | 72 | 157 | 19.2 | [124/646] | 11 | 4557871  | Iron transport                                                    |
| TF     | Transferrin                                       | 538  | SA ><br>LAr > | 1.6<br>02<br>3.9E- | E:00000012640      | <i>tridecemlineatus</i><br><i>Ictidomys</i>             | 72 | 119 | 16.6 | [107/646] | 10 | 4557871  | Iron transport                                                    |
| TF     | Transferrin                                       | 541  | SA ><br>LAr > | 1.7<br>02<br>2.5E- | E:00000012640      | <i>tridecemlineatus</i><br><i>Ictidomys</i>             | 72 | 225 | 25.2 | [163/646] | 16 | 4557871  | Iron transport                                                    |
| TF     | Transferrin                                       | 542  | SA ><br>LAr > | 1.7<br>02<br>4.7E- | E:00000012640      | <i>tridecemlineatus</i><br><i>Ictidomys</i>             | 72 | 220 | 26.0 | [168/646] | 16 | 4557871  | Iron transport                                                    |
| TF     | Transferrin                                       | 543  | SA ><br>Ent > | 1.6<br>02<br>1.7E- | E:00000012640      | <i>tridecemlineatus</i><br><i>Ictidomys</i>             | 72 | 338 | 33.8 | [218/646] | 22 | 4557871  | Iron transport                                                    |
| TF     | Transferrin                                       | 544  | SA ><br>LAr > | 1.7<br>02<br>2.5E- | E:00000012640      | <i>tridecemlineatus</i><br><i>Ictidomys</i>             | 72 | 133 | 18.1 | [117/646] | 10 | 4557871  | Iron transport                                                    |
| TF     | Transferrin                                       | 548  | SA ><br>Ent > | 1.7<br>02<br>2.1E- | E:00000012640      | <i>tridecemlineatus</i><br><i>Ictidomys</i>             | 72 | 201 | 26.8 | [173/646] | 15 | 4557871  | Iron transport                                                    |
| TF     | Transferrin                                       | 829  | SA ><br>SD >  | 1.6<br>02<br>8.0E- | E:00000012640      | <i>tridecemlineatus</i>                                 | 72 | 151 | 20.9 | [135/646] | 11 | 4557871  | Iron transport<br>Glycolysis and gluconeogenesis                  |
| TPI1   | Triosephosphate isomerase 1                       | 1786 | Ent ><br>SD > | 1.6<br>04<br>4.0E- | 17389815           | <i>Homo sapiens</i><br><i>Ictidomys</i>                 | 27 | 263 | 79.5 | [198/249] | 15 |          | Calcium binding and microtubule stabilization                     |
| TPT1   | Translationally controlled tumor protein          | 1940 | IBA ><br>LT > | 1.9<br>05<br>6.4E- | 999018489          | <i>tridecemlineatus</i><br><i>Ictidomys</i>             | 6  | 32  | 25.5 | [13/51]   | 2  | 4507669  | Calcium binding and microtubule stabilization                     |
| TRAP1  | TNF receptor-associated protein 1                 | 625  | SA ><br>IBA > | 1.4<br>03<br>2.6E- | E:00000004451      | <i>tridecemlineatus</i>                                 | 79 | 64  | 6.5  | [45/695]  | 4  | 1082886  | Chaperone                                                         |
| TRAP1  | TNF receptor-associated protein 1                 | 628  | SA ><br>Ent > | 1.4<br>02<br>3.6E- | 84781723           | <i>Rattus norvegicus</i>                                | 80 | 153 | 18.5 | [116/626] | 11 | 1082886  | Chaperone                                                         |
| TUBA3D | α-Tubulin                                         | 900  | SA ><br>Ent > | 1.3<br>02<br>7.6E- | 67463741           | <i>Bos taurus</i>                                       | 50 | 300 | 44.3 | [163/368] | 19 | 34784746 | Movement, polymerization                                          |
| TUBB2C | Tubulin β-2C chain                                | 956  | SA >          | 1.4<br>03          | 5174735            | <i>Homo sapiens</i>                                     | 50 | 358 | 38.4 | [140/365] | 24 |          | Movement, polymerization                                          |

|       |                                                                                              |      |             |              |           |                              |     |     |      |            |    |           |                                                                                             |
|-------|----------------------------------------------------------------------------------------------|------|-------------|--------------|-----------|------------------------------|-----|-----|------|------------|----|-----------|---------------------------------------------------------------------------------------------|
| UBA1  | Ubiquitin-activating enzyme E1                                                               | 267  | SD ><br>ET  | 1.6<br>04    | 74007348  | <i>Canis familiaris</i>      | 113 | 38  | 4.0  | [41/1015]  | 3  | 23510338  | Protein degradation, DNA repair                                                             |
| UBA1  | Ubiquitin-activating enzyme E1                                                               | 276  | SD ><br>LAr | 2.6E-<br>1.4 | 23510338  | <i>Homo sapiens</i>          | 118 | 36  | 1.4  | [14/978]   | 3  |           | Protein degradation, DNA repair                                                             |
| UBA1  | Ubiquitin-activating enzyme E1                                                               | 310  | SD ><br>LAr | 2.6E-<br>1.5 | 126722847 | <i>Oryctolagus cuniculus</i> | 118 | 195 | 14.5 | [142/978]  | 14 | 23510338  | Protein degradation, DNA repair                                                             |
| UBA52 | Polyubiquitin – ubiquitin moiety fusion product                                              | 2386 | LT ><br>Ent | 1.3E-<br>1.8 | 940395    | <i>Cricetulus sp.</i>        | 74  | 41  | 5.8  | [38/658]   | 3  | 4507761   | Protein degradation<br>Cytoskeleton, cell-cell and cell-matrix junctions, F-actin anchoring |
| VCL   | Vinculin                                                                                     | 241  | LT ><br>SD  | 4.1E-<br>1.3 | 194206025 | <i>Equus caballus</i>        | 124 | 359 | 17.2 | [195/1134] | 23 | 4507877   | Protein degradation, DNA repair                                                             |
| WARS  | Tryptophanyl-tRNA synthetase, cytoplasmic isoform 2                                          | 957  | Ar >s<br>SA | 4.2E-<br>1.3 | 256818746 | <i>Mus musculus</i>          | 54  | 44  | 7.3  | [29/395]   | 3  | 47419914  | Translation                                                                                 |
| YWHAG | Tyrosine 3-monooxygenase/tryptophan 5-monooxygenase activation protein, $\gamma$ polypeptide | 1687 | Ent ><br>SA | 4.1E-<br>1.2 | 82407948  | <i>Homo sapiens</i>          | 28  | 166 | 30.1 | [50/166]   | 11 | 193785841 | Signal transduction                                                                         |

Official gene symbols and names are listed for each unequivocally identified protein which differed significantly among sampled states by ANOVA after multiple test correction ( $q$  value). Supporting protein identification information such as recovered peptides and score are included. Maximum pairwise fold change between sampled states are reported (states which produced this fold change are also noted). Ensembl accession numbers all begin with ENSSTOP, and are denoted by 'E:'.
